# Supplementary material for: Trained Immunity or Tolerance: Opposing Functional Programs Induced in Human Monocytes after Engagement of Various Pattern Recognition Receptors
Source: PubMed Central journal article supplement (PMC3993125; doi:10.1128/cvi.00688-13), 2014-04
Supplement: CVI.00688-13_zcd999094955so1.pdf [file CVI.00688-13_zcd999094955so1.pdf]

**A 24 h after the training**

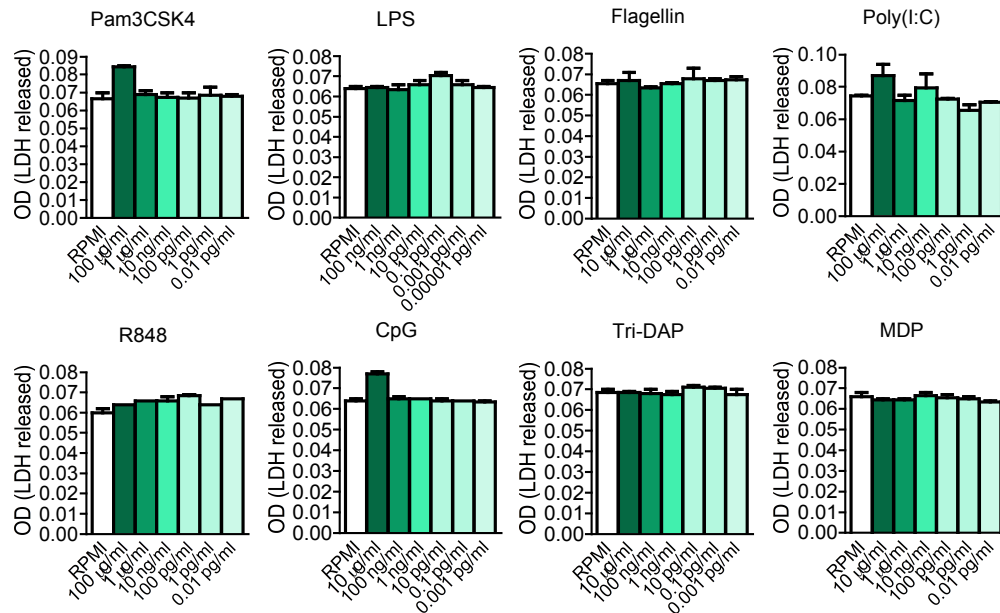

**B 7 days after the training**

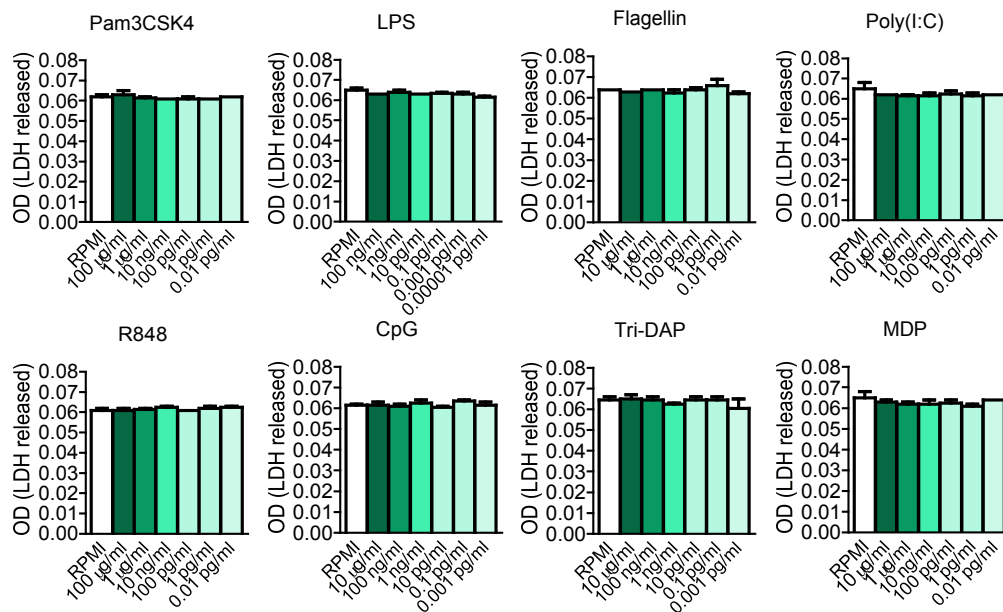

LDH cytotoxicity assay. Adherent monocytes were cocultured for 24 h with either culture medium or with different microbial ligands. Thereafter, supernatants were collected (A) and cells were further cultured in RPMI supplemented with serum for another 6 days. At day 7 supernatants were once again collected (B) and subjected to a cytotoxicity assay, conform to manufacturer's instructions. All the ligands, independently on the concentration, were proven to be non-toxic to the cells. Data are presented as mean  $\pm$  SEM (n = 2).

Supplementary Fig. 1

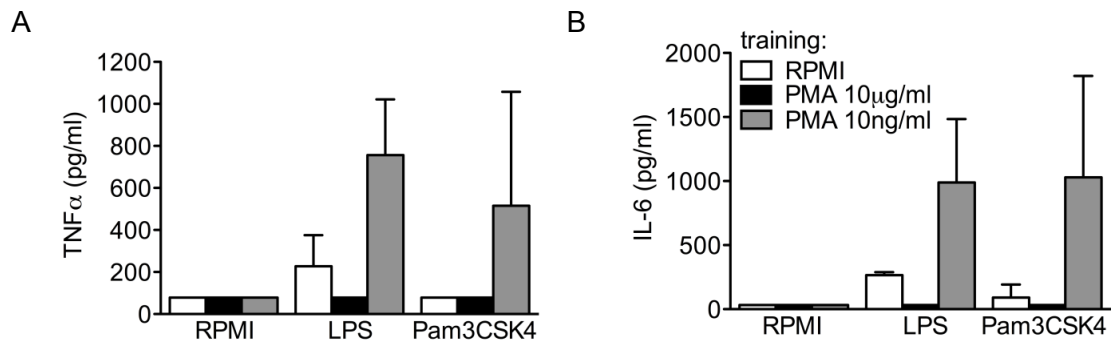

The influence of PMA on prestimulation of primary monocytes. Cells were pre-exposed for 24 h to culture medium or to PMA at two different concentrations: 10  $\mu\text{g/ml}$  and 10  $\text{ng/ml}$ . The first stimuli were washed away and adherent monocytes were further incubated for 5 days in culture medium supplemented with 10% pooled human serum. During the 6 days of incubation period, monocytes differentiate into macrophages. Cells were further subjected to a second stimulation with LPS (10  $\text{ng/ml}$ ) or Pam3CSK4 (10  $\mu\text{g/ml}$ ) for an additional 24 h.  $\text{TNF}\alpha$  (A) and IL-6 (B) were assessed in the cells culture supernatants. Data are presented as mean  $\pm$  SEM ( $n = 3$ ).

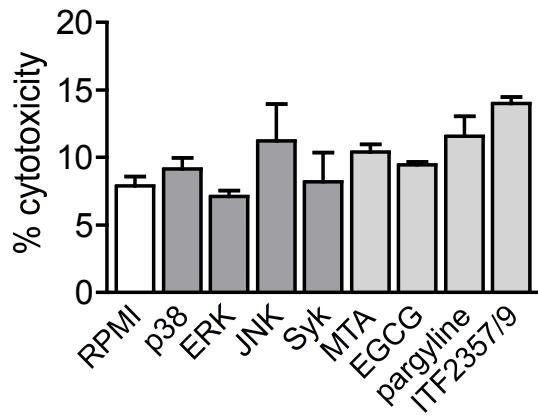

LDH cytotoxicity assay. Adherent monocytes were cocultured for 24 h with either culture medium or with p38-, ERK-, JNK-, Syk- and epigenetic inhibitors (MTA, EGCG, pargyline and ITF2357/9). Thereafter supernatants, as well as cells lysates, were collected and subjected to a cytotoxicity assay, conform to manufacturer's instructions. MAPK-, Syk- as well as epigenetic inhibitors were proven to be non-toxic to the cells. Data are presented as mean  $\pm$  SEM (n = 2).
